# Supplementary material for: The Plastic Larval Body Color of the Pale Grass Blue Butterfly Zizeeria maha (Lepidoptera: Lycaenidae) in Response to the Host Plant Color: The Maternal Effect on Crypsis
Source: MDPI journal article supplement (doi:10.3390/insects14020202), 2023-02-17
Supplement: s1 [file s1]

*INSECTS*

Supplementary Materials

**The Plastic Larval Body Color of the Pale Grass Blue Butterfly *Zizeeria maha* (Lepidoptera: Lycaenidae) in Response to the Host Plant Color: The Maternal Effect on Crypsis**

Ai Yoshida, Shintaro Yabu, Joji M. Otaki \*

*The BCPH Unit of Molecular Physiology, Department of Chemistry, Biology and Marine Science, Faculty of Science, University of the Ryukyus, Okinawa 903-0213, Japan*

\*Corresponding author at: University of the Ryukyus.

*E-mail address:* [otaki@sci.u-ryukyu.ac.jp](mailto:otaki@sci.u-ryukyu.ac.jp) (Joji M. Otaki)

**Tables S1 - S10**

Table S1. Eclosion rate and survival rate after feeding on the red-form or green-form plant

| Plant                       | Larva<br>( <i>n</i> ) | Pupa<br>( <i>n</i> ) | Eclosion<br>( <i>n</i> ) | Eclosion rate<br>(%) | Survival rate<br>(%) |
|-----------------------------|-----------------------|----------------------|--------------------------|----------------------|----------------------|
| Red form (Plant A)          | 20                    | 20                   | 19                       | 95.00                | 95.00                |
| Green form (Plant B-1, B-2) | 99                    | 98                   | 97                       | 98.98                | 97.98                |

Table S2. Single-individual tracking for body-color scores (Line D-F<sub>1</sub>-red)

| Individual number | 17 September | 19 September | 20 September |
|-------------------|--------------|--------------|--------------|
| 1                 | 3            | 3            | 0            |
| 2                 | 3            | 3            | 2            |
| 3                 | 3            | 2            | 0            |
| 4                 | 3            | 2            | 0            |
| 5                 | 3            | 2            | 0            |
| 6                 | 3            | 2            | 0            |
| 7                 | 3            | 2            | 2            |
| 8                 | 3            | 2            | 2            |
| 9                 | 2            | 3            | 2            |
| 10                | 2            | 3            | 3            |

Note: Dates indicate 2019.

Table S3. Single-individual tracking for body-color scores (Line D-F<sub>2</sub>-red)

| Individual number | 16 October | 19 October | 20 October |
|-------------------|------------|------------|------------|
| 11                | 3          | 2          | 0          |
| 12                | 3          | 3          | 2          |
| 13                | 3          | 2          | 2          |
| 14                | 3          | 3          | 0          |
| 15                | 3          | 2          | 2          |
| 16                | 3          | 2          | 2          |
| 17                | 2          | 1          | 1          |

Note: Dates indicate 2019.

Table S4. Single-individual tracking for body-color scores (Line E-F<sub>2</sub>-red)

| Individual number | 4 November | 6 or 7 November | 8 November |
|-------------------|------------|-----------------|------------|
| 18                | 3          | 3               | 2          |
| 19                | 2          | 1               | 1          |
| 20                | 2          | 2               | 2          |
| 21                | 2          | 2               | 2          |
| 22                | 2          | 1               | 1          |
| 23                | 2          | 1               | 1          |
| 24                | 2          | 1               | 1          |
| 25                | 1          | 1               | 1          |
| 26                | 1          | 1               | 1          |
| 27                | 1          | 1               | 1          |
| 28                | 1          | 1               | 1          |
| 29                | 1          | 1               | 1          |
| 30                | 0          | 1               | 1          |

Note: Dates indicate 2019.

Table S5. Single-individual tracking for body-color scores (Line E-F<sub>2</sub>-green)

| Individual number | 1 November | 4 November | 6 November |
|-------------------|------------|------------|------------|
| 31                | 3          | 2          | 1          |
| 32                | 3          | 3          | 1          |
| 33                | 3          | 3          | 2          |
| 34                | 3          | 3          | 2          |
| 35                | 3          | 1          | 1          |
| 36                | 3          | 3          | 2          |
| 37                | 2          | 1          | 0          |
| 38                | 2          | 2          | 0          |
| 39                | 2          | 0          | 0          |
| 40                | 2          | 2          | 0          |
| 41                | 2          | 1          | 1          |
| 42                | 2          | 1          | 0          |
| 43                | 2          | 1          | 1          |
| 44                | 2          | 2          | 1          |
| 45                | 1          | 0          | 0          |
| 46                | 1          | 1          | 0          |
| 47                | 1          | 1          | 0          |
| 48                | 1          | 1          | 0          |
| 49                | 1          | 1          | 0          |
| 50                | 1          | 0          | 0          |
| 51                | 1          | 1          | 1          |
| 52                | 1          | 1          | 1          |
| 53                | 1          | 1          | 1          |
| 54                | 1          | 1          | 1          |
| 55                | 1          | 2          | 1          |
| 56                | 1          | 2          | 0          |
| 57                | 1          | 1          | 1          |
| 58                | 1          | 1          | 1          |
| 59                | 0          | 0          | 0          |
| 60                | 0          | 0          | 0          |
| 61                | 0          | 0          | 0          |
| 62                | 0          | 0          | 0          |
| 63                | 0          | 0          | 0          |
| 64                | 0          | 0          | 0          |
| 65                | 0          | 0          | 0          |
| 66                | 0          | 0          | 0          |
| 67                | 0          | 0          | 0          |
| 68                | 0          | 0          | 0          |

Note: Dates indicate 2019.

Table S6. Eclosion rate and survival rate for Lines C, D, and E

| Line | Generation     | Plant | Larva<br>( <i>n</i> ) | Pupa<br>( <i>n</i> ) | Eclosion<br>( <i>n</i> ) | Eclosion<br>rate(%) | Survival<br>rate(%) |
|------|----------------|-------|-----------------------|----------------------|--------------------------|---------------------|---------------------|
| C    | F <sub>0</sub> | Red   | 20                    | 20                   | 19                       | 95.00               | 95.00               |
| C    | F <sub>0</sub> | Green | 99                    | 98                   | 97                       | 98.98               | 97.98               |
| C    | F <sub>1</sub> | Red   | 320                   | 300                  | 293                      | 97.67               | 91.56               |
| C    | F <sub>2</sub> | Red   | 107                   | 106                  | 105                      | 99.06               | 98.13               |
| C    | F <sub>2</sub> | Green | 171                   | 169                  | 169                      | 100.00              | 98.83               |
| C    | F <sub>3</sub> | Red   | 166                   | 164                  | 164                      | 100.00              | 98.80               |
| C    | F <sub>3</sub> | Green | 98                    | 96                   | 94                       | 97.92               | 95.92               |
| D    | F <sub>0</sub> | Red   | 80                    | 55                   | 54                       | 98.18               | 67.5                |
| D    | F <sub>1</sub> | Red   | 97                    | 92                   | 91                       | 98.91               | 93.81               |
| D    | F <sub>1</sub> | Green | 88                    | 85                   | 85                       | 98.82               | 95.45               |
| D    | F <sub>2</sub> | Red   | 237                   | 87                   | 76                       | 87.36               | -                   |
| D    | F <sub>2</sub> | Green | 226                   | 199                  | 169                      | 84.92               | 74.78               |
| D    | F <sub>3</sub> | Red   | 35                    | 20                   | 6                        | 30                  | 17.14               |
| D    | F <sub>3</sub> | Green | 180                   | 186                  | 181                      | 97.31               | -                   |
| E    | F <sub>0</sub> | Red   | 37                    | 55                   | 54                       | 98.19               | -                   |
| E    | F <sub>1</sub> | Red   | 39                    | 39                   | 36                       | 92.31               | 92.31               |
| E    | F <sub>1</sub> | Green | 126                   | 112                  | 108                      | 95.54               | 84.92               |
| E    | F <sub>2</sub> | Red   | 89                    | 112                  | 93                       | 83.04               | -                   |
| E    | F <sub>2</sub> | Green | 155                   | 194                  | 177                      | 91.24               | -                   |
| E    | F <sub>3</sub> | Red   | 194                   | 182                  | 88                       | 48.35               | 45.36               |
| E    | F <sub>3</sub> | Green | 147                   | 131                  | 64                       | 48.85               | 43.53               |

Table S7. Eclosion rate and survival rate for Lines F, G, and H

| Line | Generation     | Plant | Larva<br>( <i>n</i> ) | Pupa<br>( <i>n</i> ) | Eclosion<br>( <i>n</i> ) | Eclosion<br>rate(%) | Survival<br>rate(%) |
|------|----------------|-------|-----------------------|----------------------|--------------------------|---------------------|---------------------|
| F    | F <sub>0</sub> | Green | 237                   | 222                  | 221                      | 99.55               | 93.25               |
| F    | F <sub>1</sub> | Green | 80                    | 80                   | 80                       | 100.00              | 100.00              |
| F    | F <sub>1</sub> | Red   | 182                   | 164                  | 156                      | 95.12               | 85.71               |
| F    | F <sub>2</sub> | Green | 135                   | 126                  | 123                      | 97.62               | 91.11               |
| F    | F <sub>2</sub> | Red   | 64                    | 59                   | 57                       | 96.61               | 89.06               |
| F    | F <sub>3</sub> | Green | 254                   | 248                  | 238                      | 95.97               | 93.70               |
| F    | F <sub>3</sub> | Red   | 85                    | 65                   | 56                       | 86.15               | 65.88               |
| G    | F <sub>0</sub> | Green | 109                   | 107                  | 105                      | 98.13               | 96.33               |
| G    | F <sub>1</sub> | Green | 360                   | 334                  | 325                      | 97.31               | 90.28               |
| G    | F <sub>1</sub> | Red   | 139                   | 114                  | 107                      | 93.86               | 76.98               |
| G    | F <sub>2</sub> | Green | 144                   | 131                  | 129                      | 98.47               | 85.58               |
| G    | F <sub>2</sub> | Red   | 59                    | 59                   | 59                       | 100.00              | 100.00              |
| G    | F <sub>3</sub> | Green | 377                   | 370                  | 368                      | 99.46               | 97.61               |
| G    | F <sub>3</sub> | Red   | 83                    | 75                   | 73                       | 97.33               | 87.95               |
| H    | F <sub>0</sub> | Green | 241                   | 235                  | 229                      | 97.95               | 95.02               |
| H    | F <sub>1</sub> | Green | 121                   | 106                  | 102                      | 96.23               | 84.30               |
| H    | F <sub>1</sub> | Red   | 86                    | 75                   | 69                       | 92.00               | 71.88               |
| H    | F <sub>2</sub> | Green | 121                   | 120                  | 115                      | 95.83               | 95.04               |
| H    | F <sub>2</sub> | Red   | 36                    | 30                   | 30                       | 100.00              | 83.33               |

Table S8. Larval body-color scores

| Line | Generation     | Plant | Score 0<br>( <i>n</i> ) | Score 1<br>( <i>n</i> ) | Score 2<br>( <i>n</i> ) | Score 3<br>( <i>n</i> ) | Number of<br>larvae ( <i>n</i> ) |
|------|----------------|-------|-------------------------|-------------------------|-------------------------|-------------------------|----------------------------------|
| C    | F <sub>1</sub> | Red   | 91                      | 181                     | 130                     | 51                      | 453                              |
| C    | F <sub>2</sub> | Red   | 0                       | 34                      | 48                      | 15                      | 97                               |
| C    | F <sub>2</sub> | Green | 57                      | 51                      | 52                      | 7                       | 167                              |
| C    | F <sub>3</sub> | Red   | 11                      | 70                      | 80                      | 16                      | 177                              |
| C    | F <sub>3</sub> | Green | 6                       | 37                      | 42                      | 14                      | 99                               |
| D    | F <sub>0</sub> | Red   | 17                      | 27                      | 28                      | 8                       | 80                               |
| D    | F <sub>1</sub> | Red   | 18                      | 36                      | 28                      | 15                      | 97                               |
| D    | F <sub>1</sub> | Green | 50                      | 34                      | 2                       | 2                       | 88                               |
| D    | F <sub>2</sub> | Red   | 50                      | 95                      | 69                      | 23                      | 237                              |
| D    | F <sub>2</sub> | Green | 83                      | 84                      | 39                      | 20                      | 226                              |
| D    | F <sub>3</sub> | Red   | 11                      | 16                      | 7                       | 1                       | 35                               |
| D    | F <sub>3</sub> | Green | 102                     | 33                      | 28                      | 17                      | 180                              |
| E    | F <sub>0</sub> | Red   | 6                       | 22                      | 6                       | 3                       | 37                               |
| E    | F <sub>1</sub> | Red   | 19                      | 15                      | 3                       | 0                       | 37                               |
| E    | F <sub>1</sub> | Green | 51                      | 51                      | 16                      | 8                       | 126                              |
| E    | F <sub>2</sub> | Red   | 9                       | 49                      | 23                      | 8                       | 89                               |
| E    | F <sub>2</sub> | Green | 45                      | 68                      | 27                      | 15                      | 155                              |
| E    | F <sub>3</sub> | Red   | 41                      | 61                      | 49                      | 43                      | 194                              |
| E    | F <sub>3</sub> | Green | 41                      | 58                      | 25                      | 23                      | 147                              |
| F    | F <sub>0</sub> | Green | 135                     | 57                      | 40                      | 5                       | 237                              |
| F    | F <sub>1</sub> | Green | 19                      | 21                      | 40                      | 0                       | 80                               |
| F    | F <sub>1</sub> | Red   | 87                      | 26                      | 51                      | 18                      | 182                              |
| F    | F <sub>2</sub> | Green | 60                      | 40                      | 29                      | 6                       | 135                              |
| F    | F <sub>2</sub> | Red   | 8                       | 36                      | 18                      | 2                       | 64                               |
| F    | F <sub>3</sub> | Green | 116                     | 119                     | 19                      | 0                       | 254                              |
| F    | F <sub>3</sub> | Red   | 37                      | 39                      | 7                       | 2                       | 85                               |
| G    | F <sub>0</sub> | Green | 52                      | 27                      | 27                      | 3                       | 109                              |
| G    | F <sub>1</sub> | Green | 116                     | 77                      | 135                     | 32                      | 360                              |
| G    | F <sub>1</sub> | Red   | 12                      | 61                      | 61                      | 5                       | 139                              |
| G    | F <sub>2</sub> | Green | 59                      | 52                      | 33                      | 0                       | 144                              |
| G    | F <sub>2</sub> | Red   | 28                      | 23                      | 8                       | 0                       | 59                               |
| G    | F <sub>3</sub> | Green | 103                     | 121                     | 105                     | 48                      | 377                              |
| G    | F <sub>3</sub> | Red   | 11                      | 40                      | 16                      | 16                      | 83                               |

|   |                |       |    |    |    |    |     |
|---|----------------|-------|----|----|----|----|-----|
| H | F <sub>0</sub> | Green | 70 | 90 | 68 | 13 | 241 |
| H | F <sub>1</sub> | Green | 38 | 34 | 40 | 9  | 121 |
| H | F <sub>1</sub> | Red   | 18 | 30 | 30 | 8  | 86  |
| H | F <sub>2</sub> | Green | 32 | 31 | 48 | 10 | 121 |
| H | F <sub>2</sub> | Red   | 2  | 11 | 18 | 5  | 36  |

Table S9. Number of red/green larvae for the red larval frequency in Lines C, D, and E

| Line | Plant | F <sub>0</sub> | F <sub>1</sub> | F <sub>2</sub> | F <sub>3</sub> |
|------|-------|----------------|----------------|----------------|----------------|
| C    | Red   |                | 362 / 91       | 97 / 0         | 166 / 11       |
| D    | Red   | 63 / 17        | 79 / 18        | 187 / 50       | 24 / 11        |
| E    | Red   | 31 / 6         | 18 / 19        | 80 / 9         | 153 / 41       |
| C    | Green |                |                | 110 / 57       | 93 / 6         |
| D    | Green |                | 38 / 50        | 143 / 83       | 78 / 102       |
| E    | Green |                | 75 / 51        | 110 / 45       | 106 / 41       |

Note: Numbers indicate (the number of red larvae) / (number of green larvae).

Table S10. Number of red/green larvae for the red larval frequency in Lines F, G, and H

| Line | Plant | F <sub>0</sub> | F <sub>1</sub> | F <sub>2</sub> | F <sub>3</sub> |
|------|-------|----------------|----------------|----------------|----------------|
| F    | Red   |                | 95 / 87        | 56 / 8         | 48 / 37        |
| G    | Red   |                | 127 / 12       | 31 / 28        | 72 / 11        |
| H    | Red   |                | 68 / 18        | 34 / 2         |                |
| F    | Green | 102 / 135      | 61 / 19        | 75 / 60        | 138 / 116      |
| G    | Green | 57 / 52        | 244 / 116      | 85 / 59        | 274 / 103      |
| H    | Green | 171 / 70       | 83 / 38        | 89 / 32        |                |

Note: Numbers indicate (the number of red larvae) / (number of green larvae).
